# Supplementary material for: Fullerene superlattices containing charge transfer complexes for an improved nonlinear optical performance
Source: Royal Society of Chemistry journal article supplement (doi:10.1039/d1nr06748f), 2021-12-22
Supplement: d1nr06748f1.pdf [file d1nr06748f1.pdf]

Supporting Information

**Fullerene Superlattices Containing Charge Transfer Complexes for Enhanced Nonlinear  
Optical Performance**

Jinrui Li, Hongguang Li,\* Jingcheng Hao

Key Laboratory of Colloid and Interface Chemistry, Ministry of Education, School of Chemistry and Chemical  
Engineering, Shandong University, Jinan 250100, China. E-mail: hgli@sdu.edu.cn.

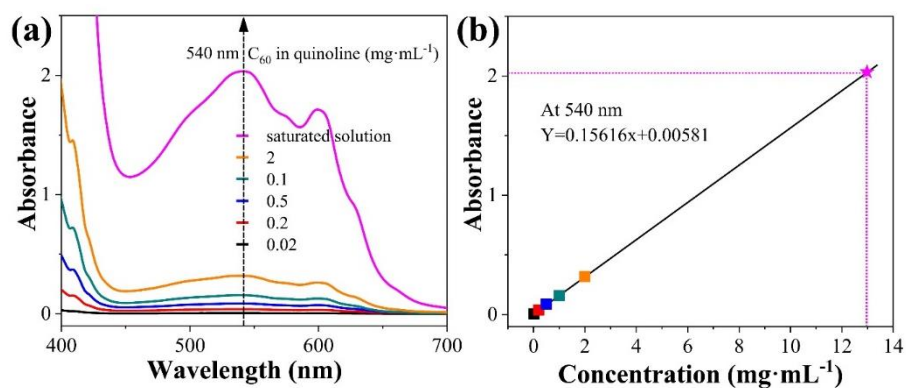

**Fig. S1** a) UV-vis spectra of  $C_{60}$  in quinoline with exact concentrations and the supersaturated solution at unknown concentration, respectively. b) Linear fitting diagram of the concentration and absorbance at 540 nm for quinoline solutions of  $C_{60}$ . The concentration of the supersaturated solution was estimated based on its absorbance (marked with a pink asterisk).

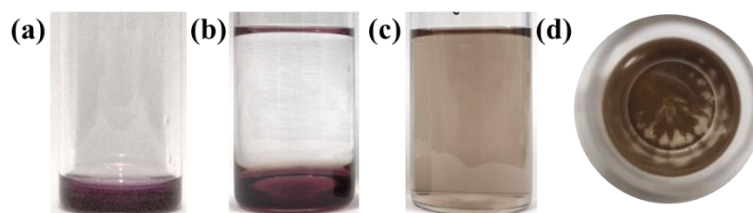

**Fig. S2** Photos of the samples during the preparation of  $C_{60}$  microcrystals by LLIP method. (a) 1 mL  $C_{60}$  quinoline solution ( $2 \text{ mg}\cdot\text{mL}^{-1}$ ) with 1 mL buffer layer (quinolone/alcohol,  $v/v=1:1$ ) on the top. (b) The sample after slowly injecting 15 mL of poor solvent (EtOH in this case). (c) The sample after 1 h of incubation and 5 min of ultrasonication. (d) The sample after standing at  $20 \text{ }^\circ\text{C}$  for 12 h where the microcrystals fully precipitated. Photos a-c are side views, while photo d is a top view.

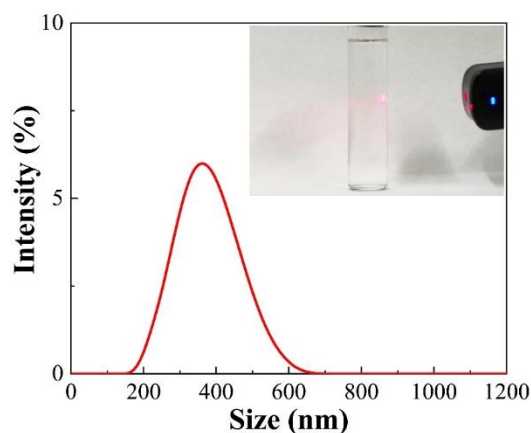

**Fig. S3** DLS curve of the quinoline/MeOH mixture with the same volume ratio as that used for preparation of HPH. Inset is a photograph of the quinoline/MeOH mixture taken immediately after ultrasound, which shows Tyndall effect.

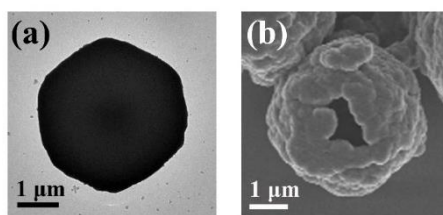

**Fig. S4** a) TEM and b) SEM images of typical  $C_{60}$  superstructures obtained without ultrasound, which showed similar morphologies to HPH.

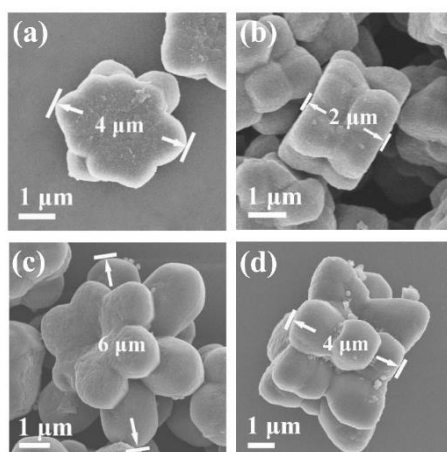

**Fig. S5** SEM images of the  $C_{60}$  MFs prepared by adjusting the incubation time before ultrasonication to 0 h (a, b) and 2 h (c, d), respectively. Top view (a, c) and side view (b, d).

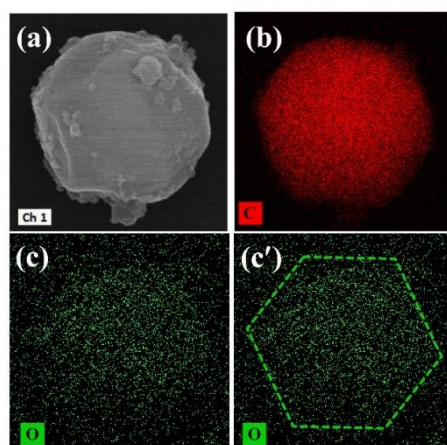

**Fig. S6** SEM images with EDS mapping of a typical HPH. The polygon in panel c' is a guide for the eyes.

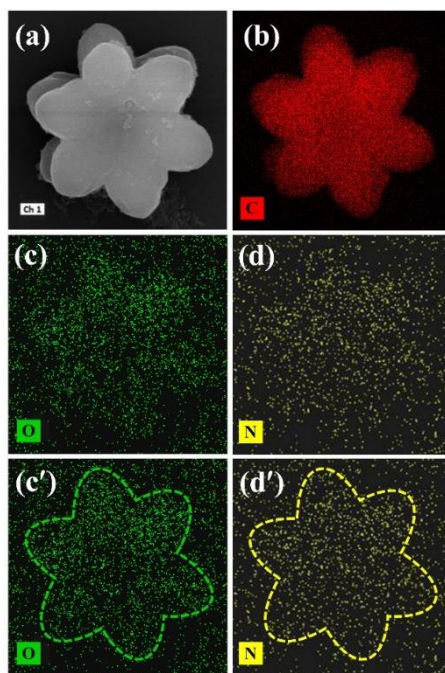

**Fig. S7** SEM images with EDS mapping of a typical MF. The stars in panels c' and d' are guides for the eyes.

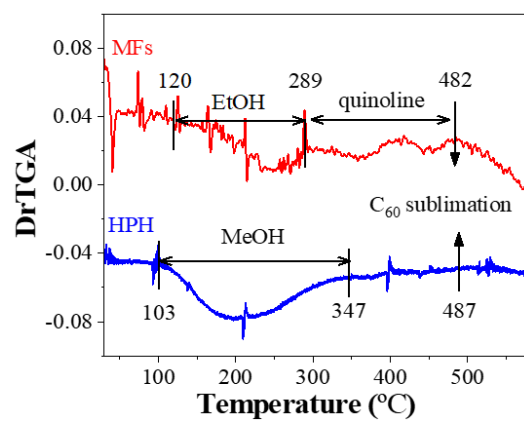

**Fig. S8** DrTGA curves of HPH and MFs.

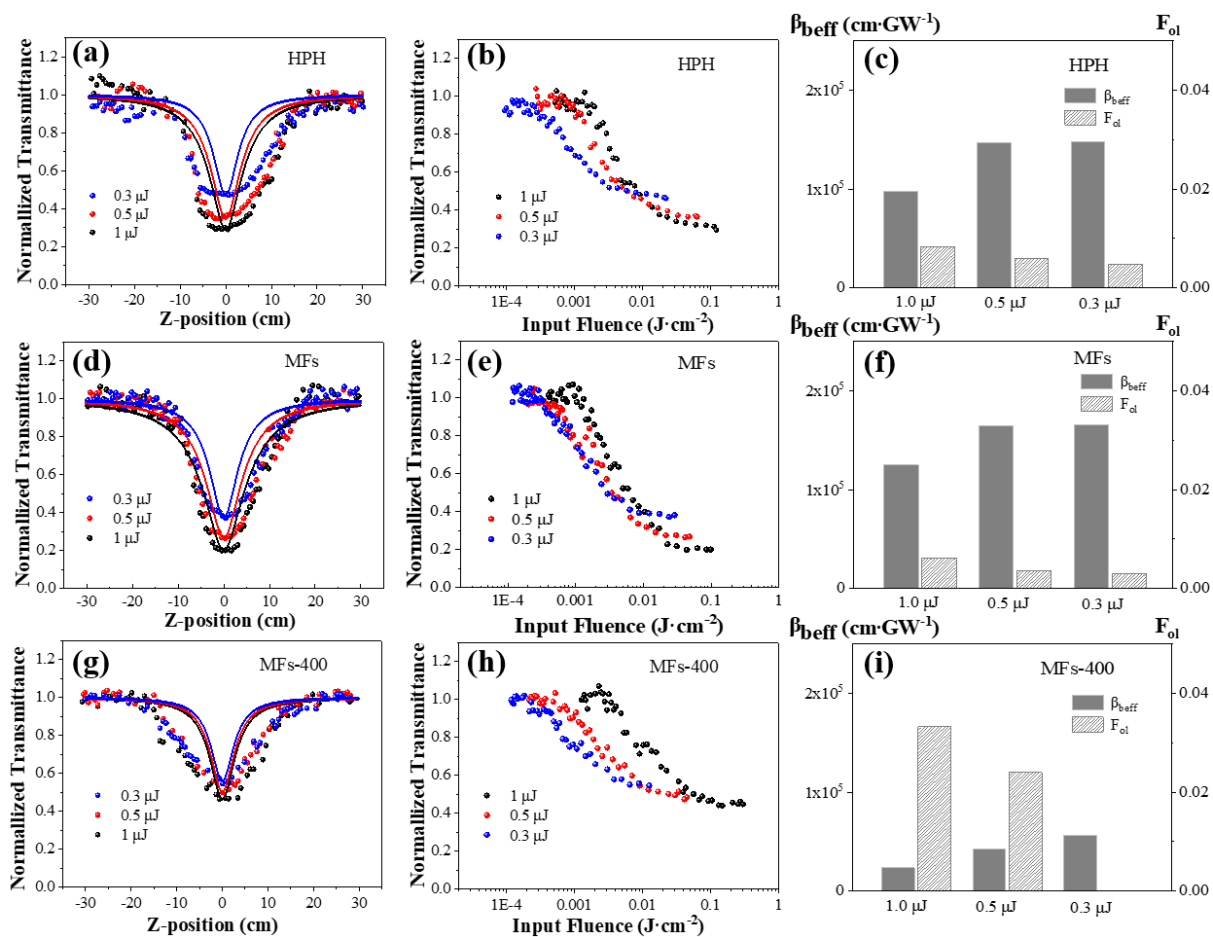

**Fig.S9** Open aperture Z-scan curves (a, d, g), optical limiting responses (b, e, h) and statistics of  $\beta$  and  $F_{\text{ol}}$  (c, f, i) of the PMMA films containing 0.5 wt% of HPH (a-c), MFs (d-f), and MFs-400 (g-i), respectively, obtained under 532 nm, 5 ns laser pulses with different energies as indicated. The solid lines in a, d, g depict theoretical fits.

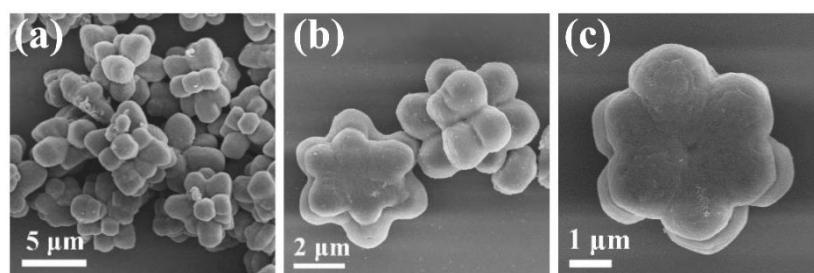

**Fig. S10** SEM images with different magnifications of MFs-400.

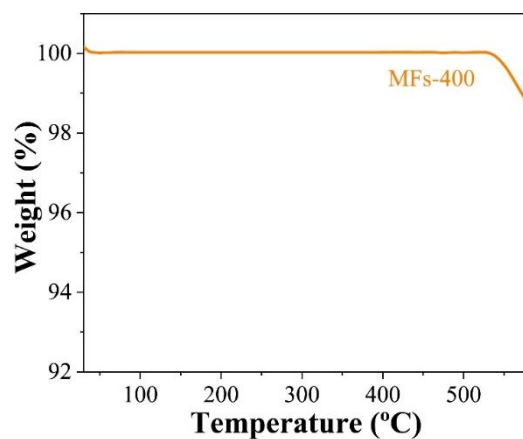

**Fig. S11** TGA curve of **MFs-400**. Data from pristine  $C_{60}$  are also given for comparison.

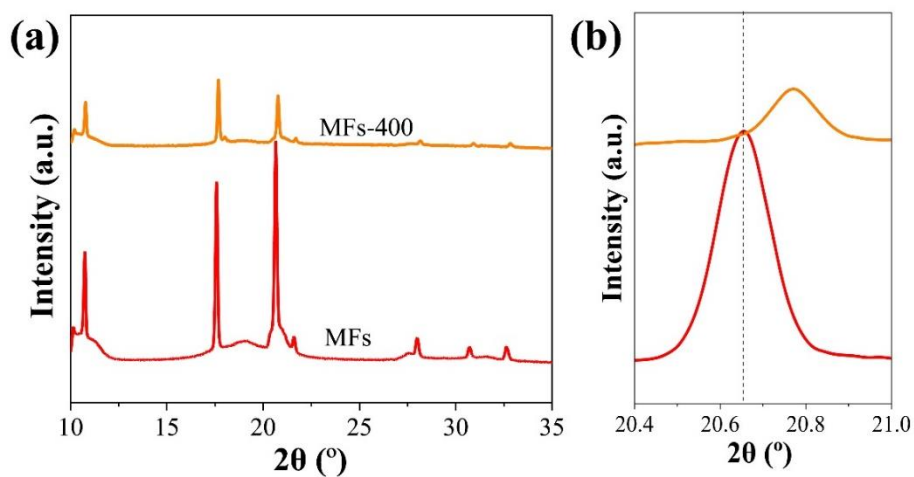

**Fig.S12** a) XRD patterns of **MFs-400**. For comparison, data from **MFs** are also given. b) Magnified peaks of the (112) planes of the *hcp* lattices. The dashed line is a guide for the eyes.

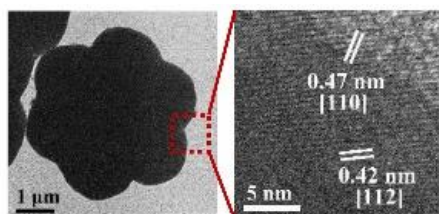

**Fig. S13** TEM and HR-TEM images of **MFs-400**.

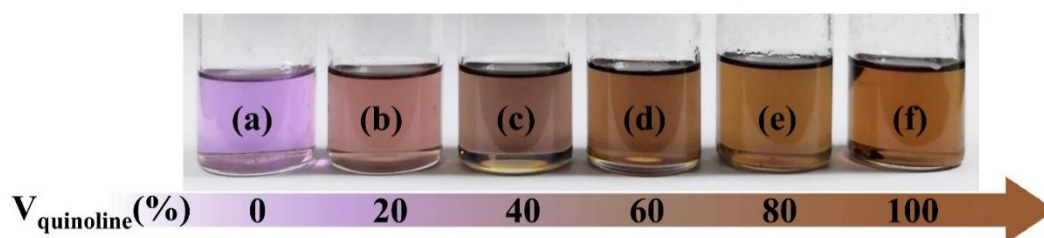

**Fig. S14** The solvatochromic effect of  $0.2 \text{ mg}\cdot\text{mL}^{-1} \text{ C}_{60}$  in  $\text{CH}_2\text{Cl}_2/\text{quinoline}$  mixed solvent with a fixed total volume of 5 mL but varying volume percentage of quinoline. With the increase of the quinoline ratio (from left to right), the solution gradually changed from light purple to tan.

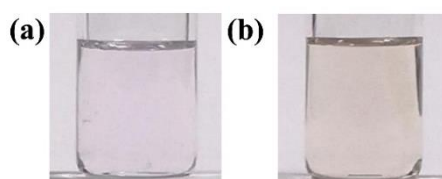

**Fig. S15** Photos of diluted solutions from sample a (left) and sample f (right) in Fig. S14 by taking  $200 \mu\text{L}$  of the stock solution and diluting with  $\text{CH}_2\text{Cl}_2$  to 1 mL.

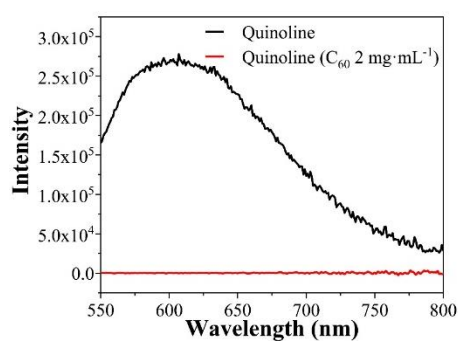

**Fig. S16** Fluorescence spectra of quinoline before and after adding  $\text{C}_{60}$ . The wavelength of excitation is 532 nm and the slit width is 5 nm.

**Table S1** Nonlinear absorption coefficient  $\beta$  and optical limiting value  $F_{ol}$  of some typical RSA materials at 532 nm.

| $\beta$ (cm·GW <sup>-1</sup> )       | $F_{ol}$ (J·cm <sup>-2</sup> ) | Materials                                  | Reference        |
|--------------------------------------|--------------------------------|--------------------------------------------|------------------|
| 11.9                                 | \                              | TPhA-(C <sub>60</sub> ) <sub>2</sub>       | 22               |
| $1.4 \times 10^{-12}$                | \                              | Penta(ZnP)C <sub>60</sub>                  | 23               |
| \                                    | ~0.8                           | [60]fullerene containing dyads (porphyrin) | 24               |
| \                                    | 0.63                           | poly(C <sub>70</sub> -Py) film             | 27               |
| 241.73                               | 4.5                            | BP:C <sub>60</sub> annealing               | 46               |
| \                                    | 0.25                           | C <sub>60</sub> tpy-Ag                     | 49               |
| 760                                  | 0.31                           | Modified [60]fullerene doped cholesteric   | 50               |
| <b><math>1.25 \times 10^5</math></b> | <b>0.00625</b>                 | <b>MFs (Multilayer flowers)</b>            | <b>This work</b> |

**Table S2** Reduction potential versus Fc<sup>+</sup>/Fc for 0.2 mg·mL<sup>-1</sup> C<sub>60</sub> in CH<sub>2</sub>Cl<sub>2</sub>/quinoline mixed solution with a fixed total volume of 5 mL ( $V_q$  represents the volume percentage of quinoline in the mixed solution).

| $V_q$ (%) | CV                 |                    |                    |                    | DPV                |                    |                    |                    |
|-----------|--------------------|--------------------|--------------------|--------------------|--------------------|--------------------|--------------------|--------------------|
|           | E <sup>1</sup> red | E <sup>2</sup> red | E <sup>3</sup> red | E <sup>4</sup> red | E <sup>1</sup> red | E <sup>2</sup> red | E <sup>3</sup> red | E <sup>4</sup> red |
| 0         | -0.664             | -1.136             | -1.544             | -2.012             | -0.407             | -1.075             | -1.499             | -1.947             |
| 20        | N/A                | -1.141             | -1.549             | -2.031             | N/A                | -1.079             | -1.507             | -1.983             |
| 40        | N/A                | -1.145             | -1.552             | -2.039             | N/A                | -1.099             | -1.518             | -1.992             |
| 60        | N/A                | -1.167             | -1.632             | -2.075             | N/A                | -1.128             | -1.542             | -2.007             |
| 80        | N/A                | -1.180             | -1.643             | -2.087             | N/A                | -1.134             | -1.547             | -2.011             |
| 100       | N/A                | -1.195             | -1.650             | -2.100             | N/A                | -1.151             | -1.601             | -2.033             |
